# Supplementary material for: Stromal-derived factor-1α/CXCL12-CXCR4 chemotactic pathway promotes perineural invasion in pancreatic cancer
Source: PubMed Central journal article supplement (PMC4467110; doi:10.18632/oncotarget.3069), 2014-12-26
Supplement: oncotarget-06-4717-s001.pdf [file oncotarget-06-4717-s001.pdf]

## Stromal-derived factor-1 $\alpha$ /CXCL12-CXCR4 chemotactic pathway promotes perineural invasion in pancreatic cancer

### Supplementary Material

**Table S1: PCR Primer Sequences**

| Genes          | Primer Sequence                                                             |
|----------------|-----------------------------------------------------------------------------|
| Human          |                                                                             |
| $\beta$ -actin | P1: 5'- AGCGAGCATCCCCCAAAGTT -3'<br>P2: 5'- GGGCACGAAGGCTCATCATT -3'        |
| CXCL12         | P1: 5'- GTGGTCGTGCTGGTCCTC -3'<br>P2: 5'- CACACTTGTCTGTTGTTGTTCTTC -3'      |
| CXCR4          | P1: 5'- TCTGTGACCGCTTCTACC -3'<br>P2: 5'- AGGATGAGGATGACTGTGG -3'           |
| NGF            | P1: 5'- GTCATCATCCCATCCCATCTTCC -3'<br>P2: 5'- CACTGTTGTTAATGTTACCTCTCC -3' |
| uPA            | P1: 5'- TAAGAGCTGGTGTCTGATTG -3'<br>P2: 5'- TTGGATGAACTAGGCTAAAA -3'        |
| MMP-2          | P1: 5'- GATGATGCCTTTGCTCGTGC -3'<br>P2: 5'- CAAAGGGGTATCCATCGCCA -3'        |
| Rat            |                                                                             |
| $\beta$ -actin | P1: 5'- TCAGGTCATCACTATCGGCAAT -3'<br>P2: 5'- AAAGAAAGGGTGTAACCGC -3'       |
| CXCL12         | P1: 5'- ATGTCGCCAGAGCCAACG -3'<br>P2: 5'- TCCACTTTAATTTTCGGGTCAATGC -3'     |
| CXCR4          | P1: 5'- CCGTGGCTGACCTCCTTTG -3'<br>P2: 5'- TGGTGGCGTGGACAATGGC -3'          |

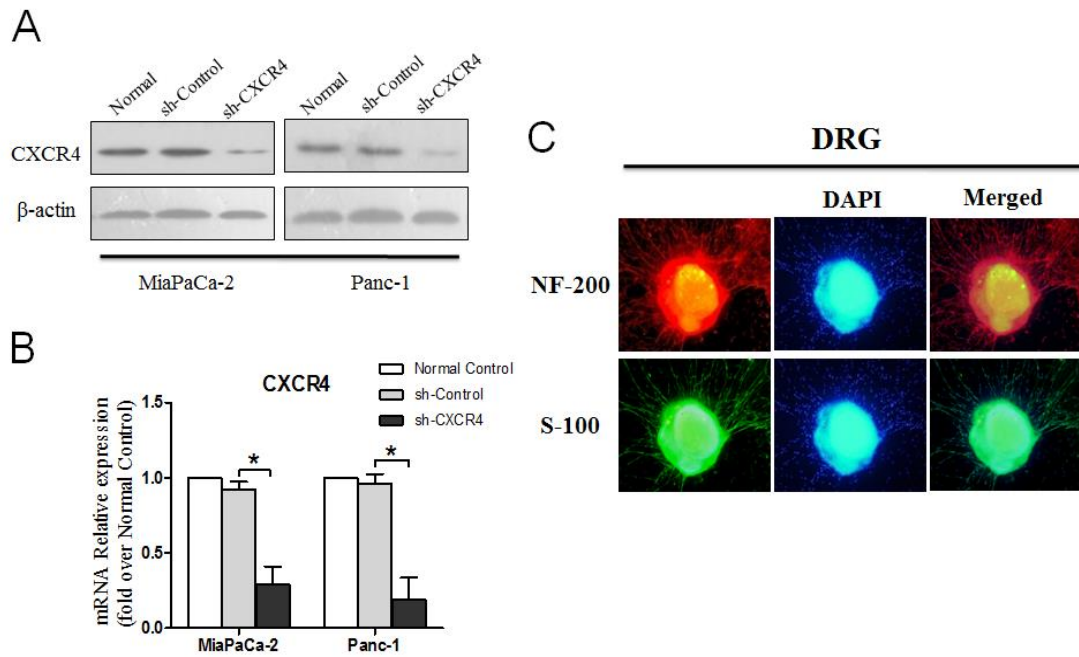

**Supplementary Fig. 1:** The establishment of PCa cells with stable CXCR4-silencing. After transfection with control shRNA or CXCR4 shRNA, the expression level of the CXCR4 protein (A) and mRNA (B) in Panc-1 and MiaPaCa-2 cells was evaluated by western blot and real-time PCR. The expression level of each target gene was quantified relative to  $\beta$ -actin as a normalization control. (C) DRGs were labeled with fluorescence-conjugated S-100 (green) and NF-200 (red) specific antibodies. Nuclei were stained with DAPI (blue; 100 $\times$  magnification);

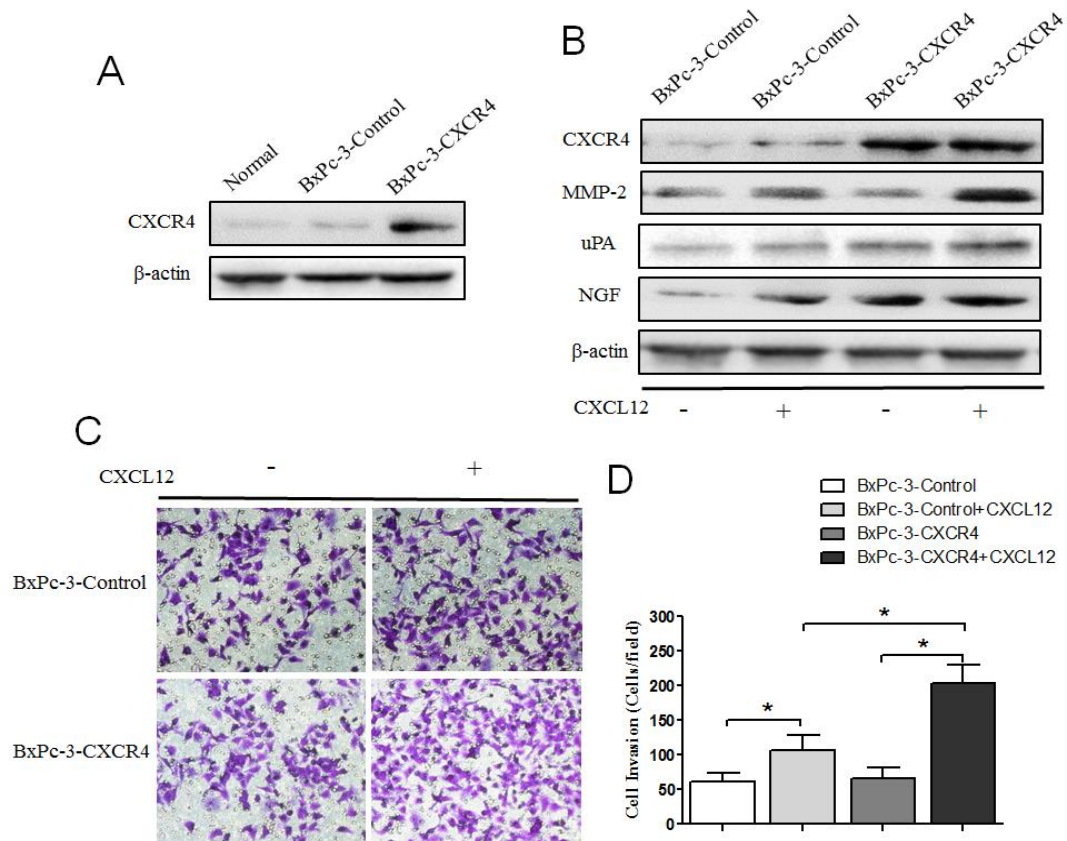

**Supplementary Fig. 2:** (A) The expression level of CXCR4 protein in BxPc-3 cells transduced by lentiviral vectors for CXCR4-GFP or GFP control was evaluated by western blot. (B) Western blot was performed to evaluate the effect of enforced expression of CXCR4 in BxPc-3 cells on the MMP-2, uPA and NGF at protein level. (C) A Matrigel invasion assay was performed to evaluate the invasion capacity of BxPc-3-CXCR4 cells. (D) The number of invaded cells was quantified by counting the number of cells from 10 random fields at 200 $\times$  magnification. The data are representative of 3 independent experiments. Column: mean (n = 10); bar: SD; \* $P$  < 0.05.
